# Supplementary material
Source: bioRxiv or medRxiv preprint supplement (https://www.biorxiv.org/highwire/filestream/106688/field_highwire_adjunct_files/0/352351-1.pdf)
Supplement: Supplementary file [file 352351-1.pdf]

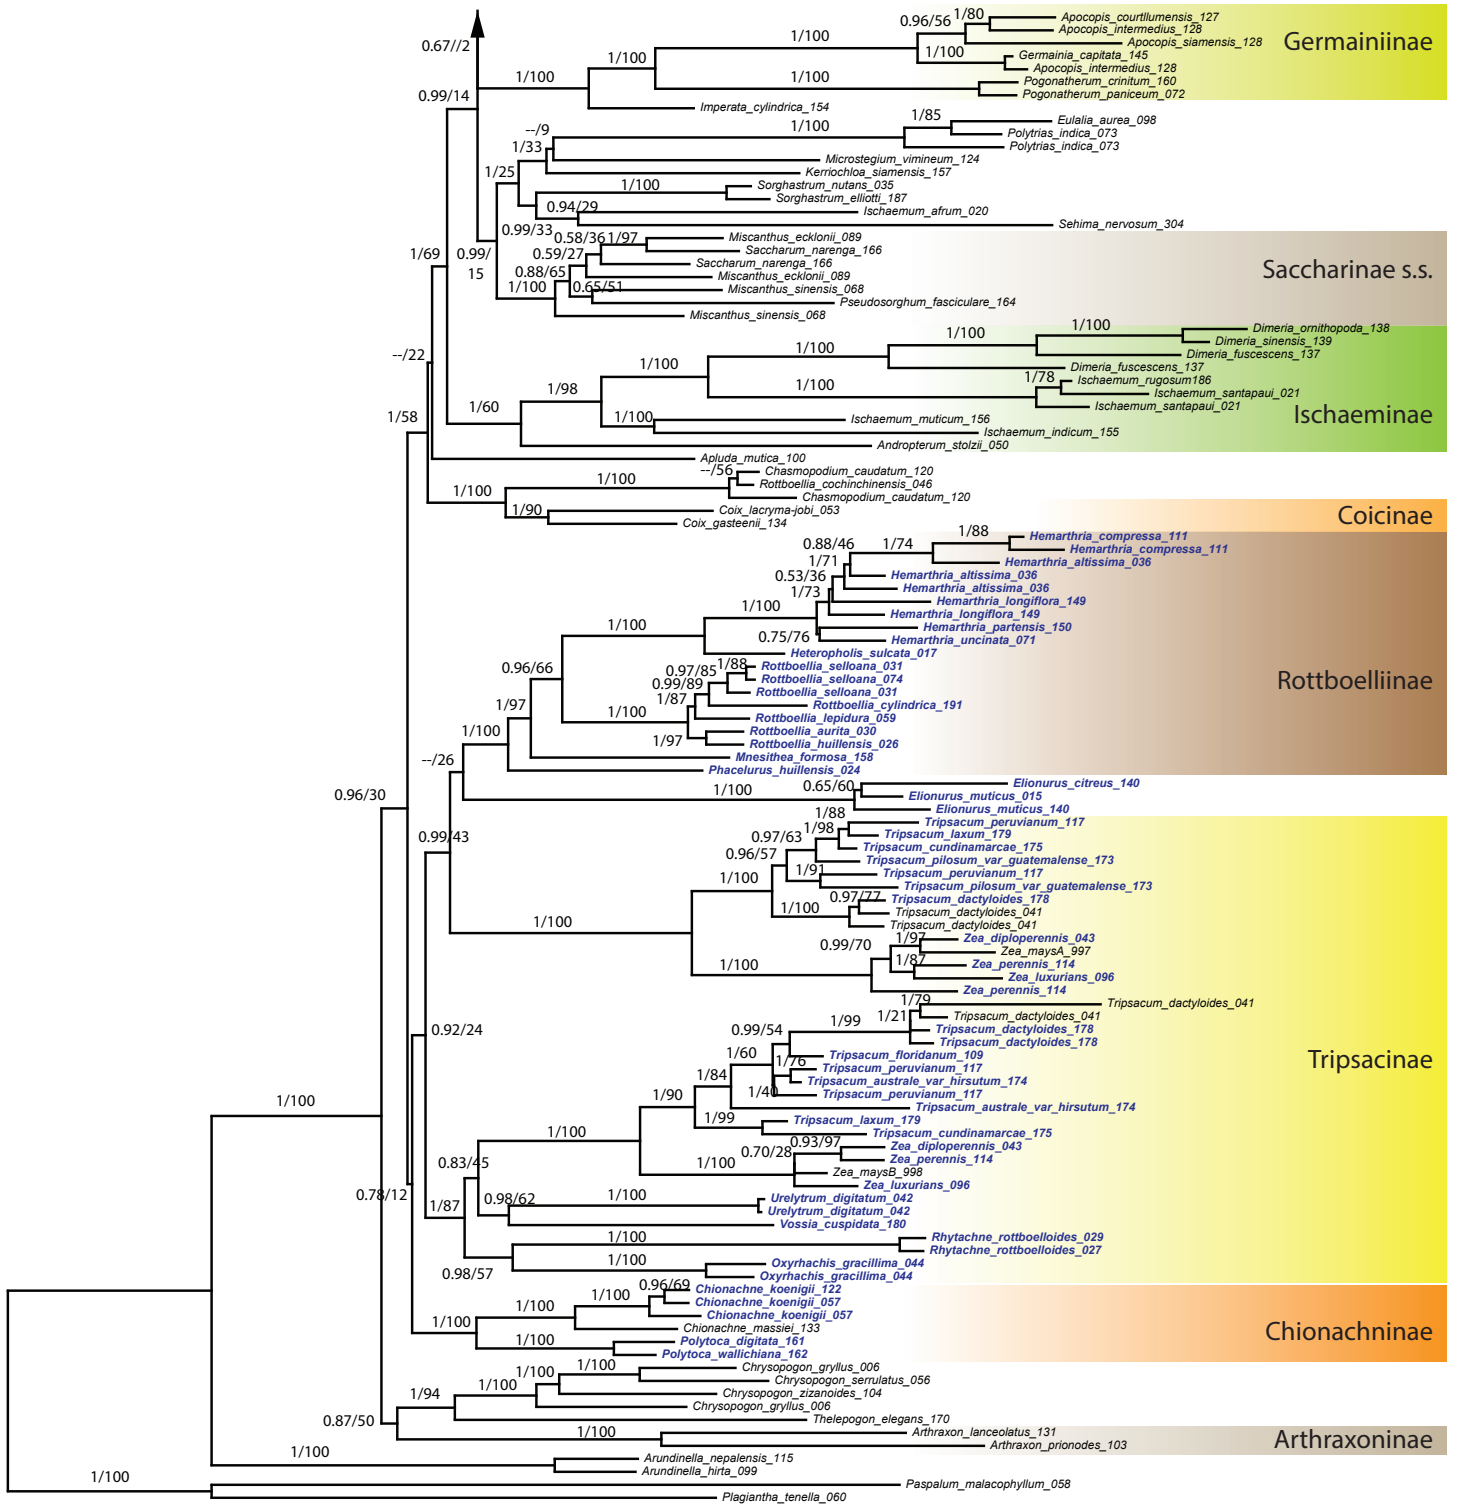

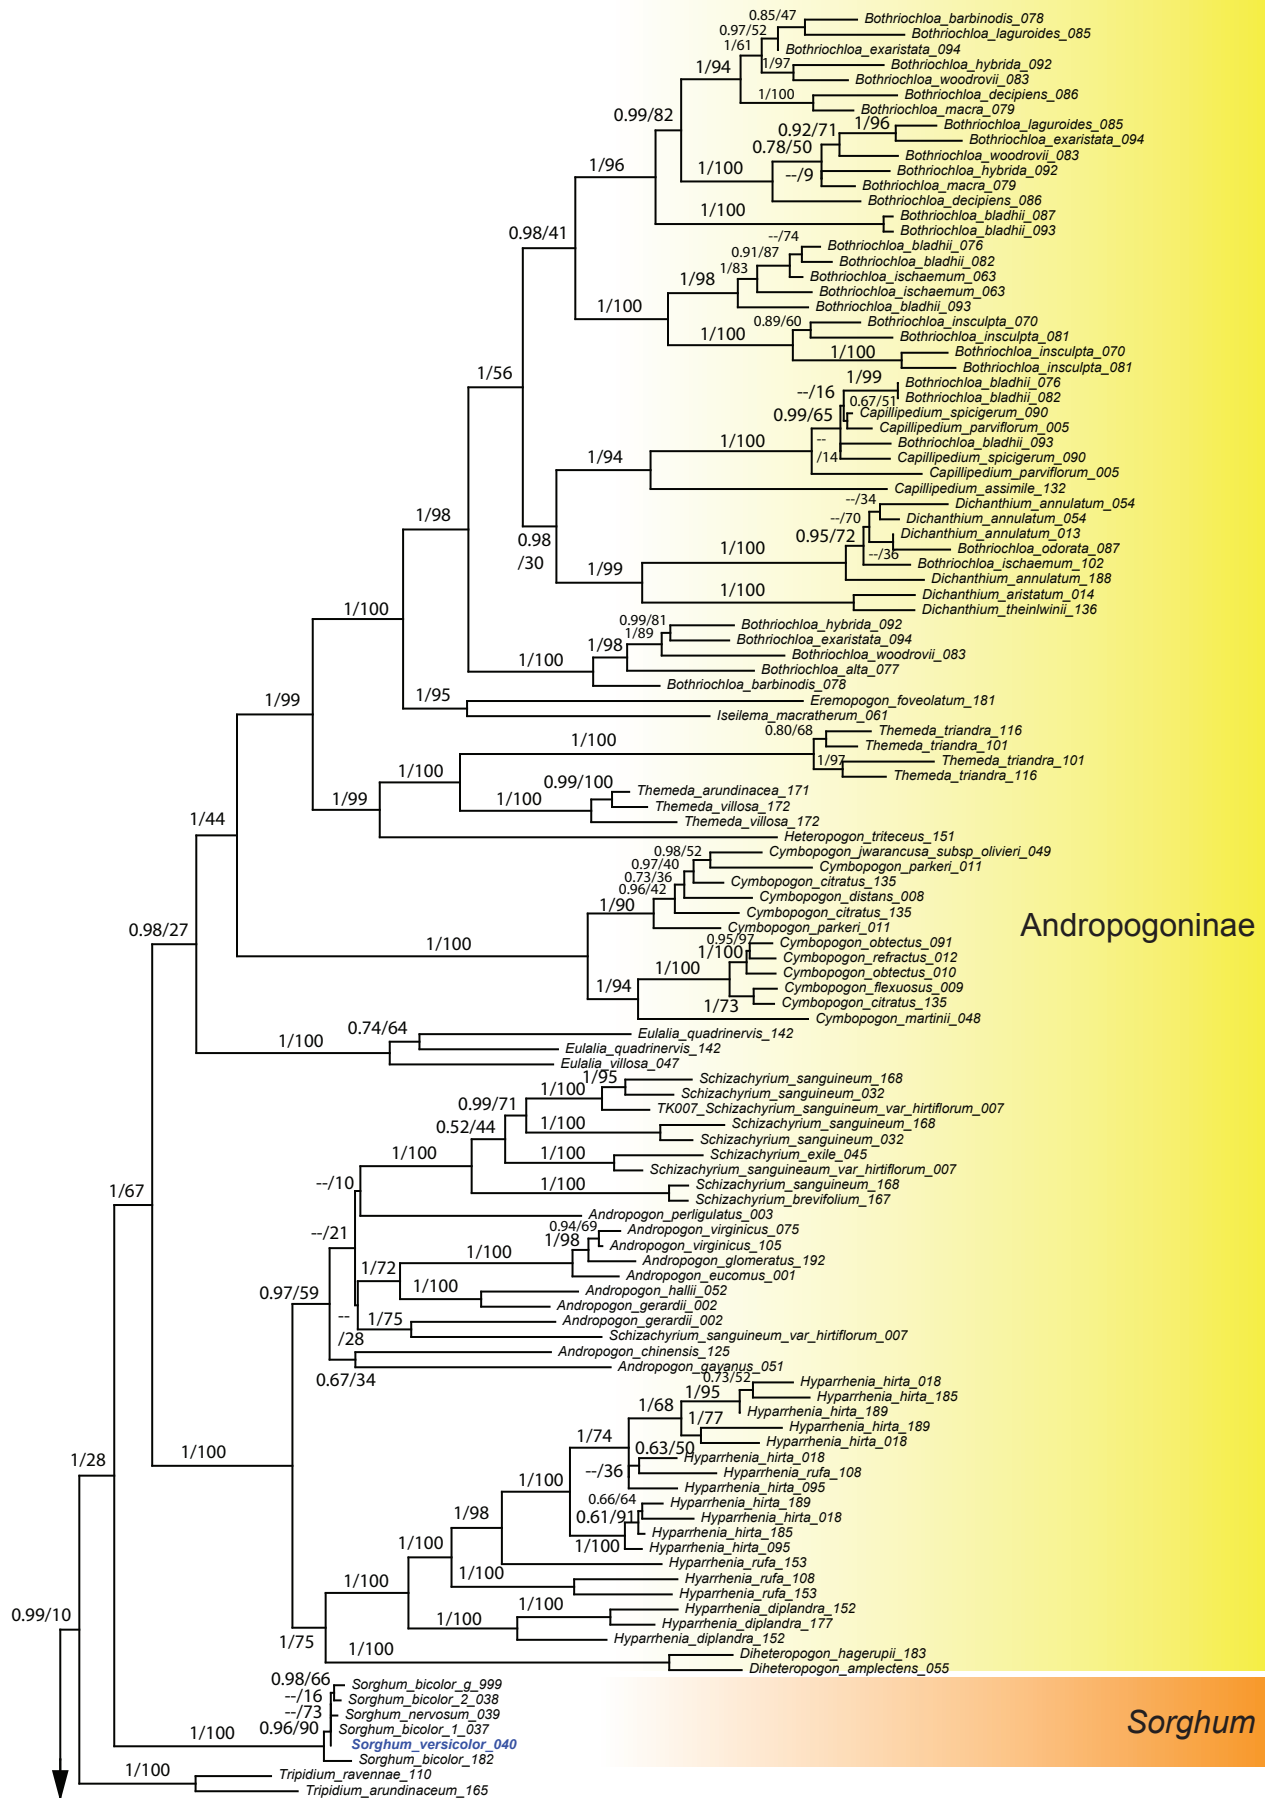

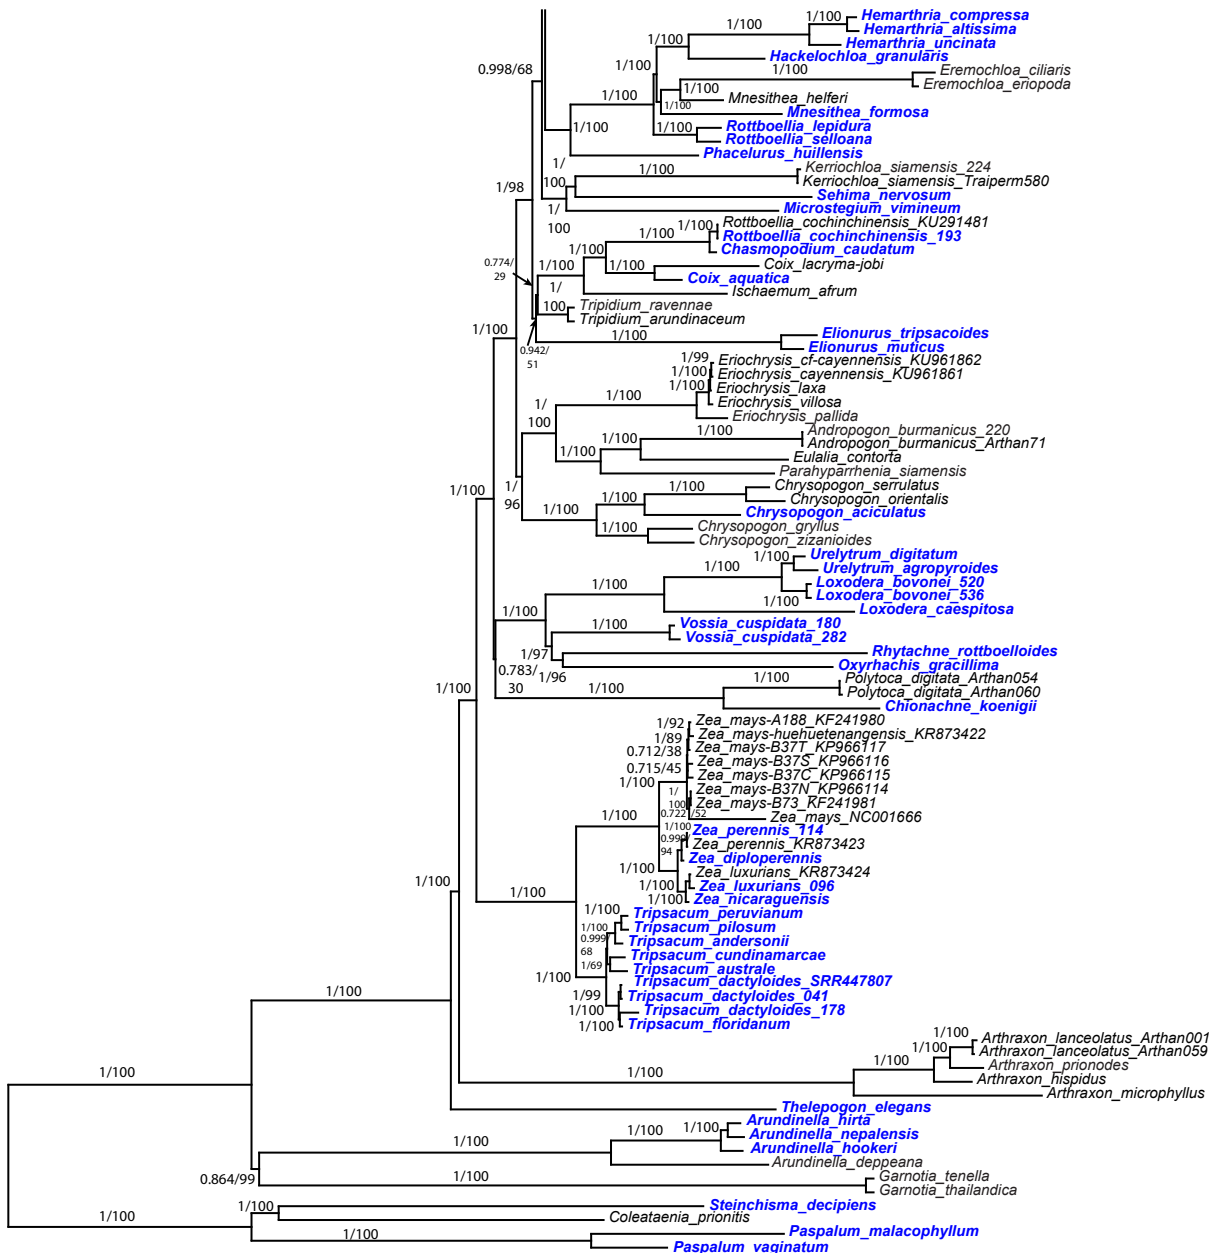

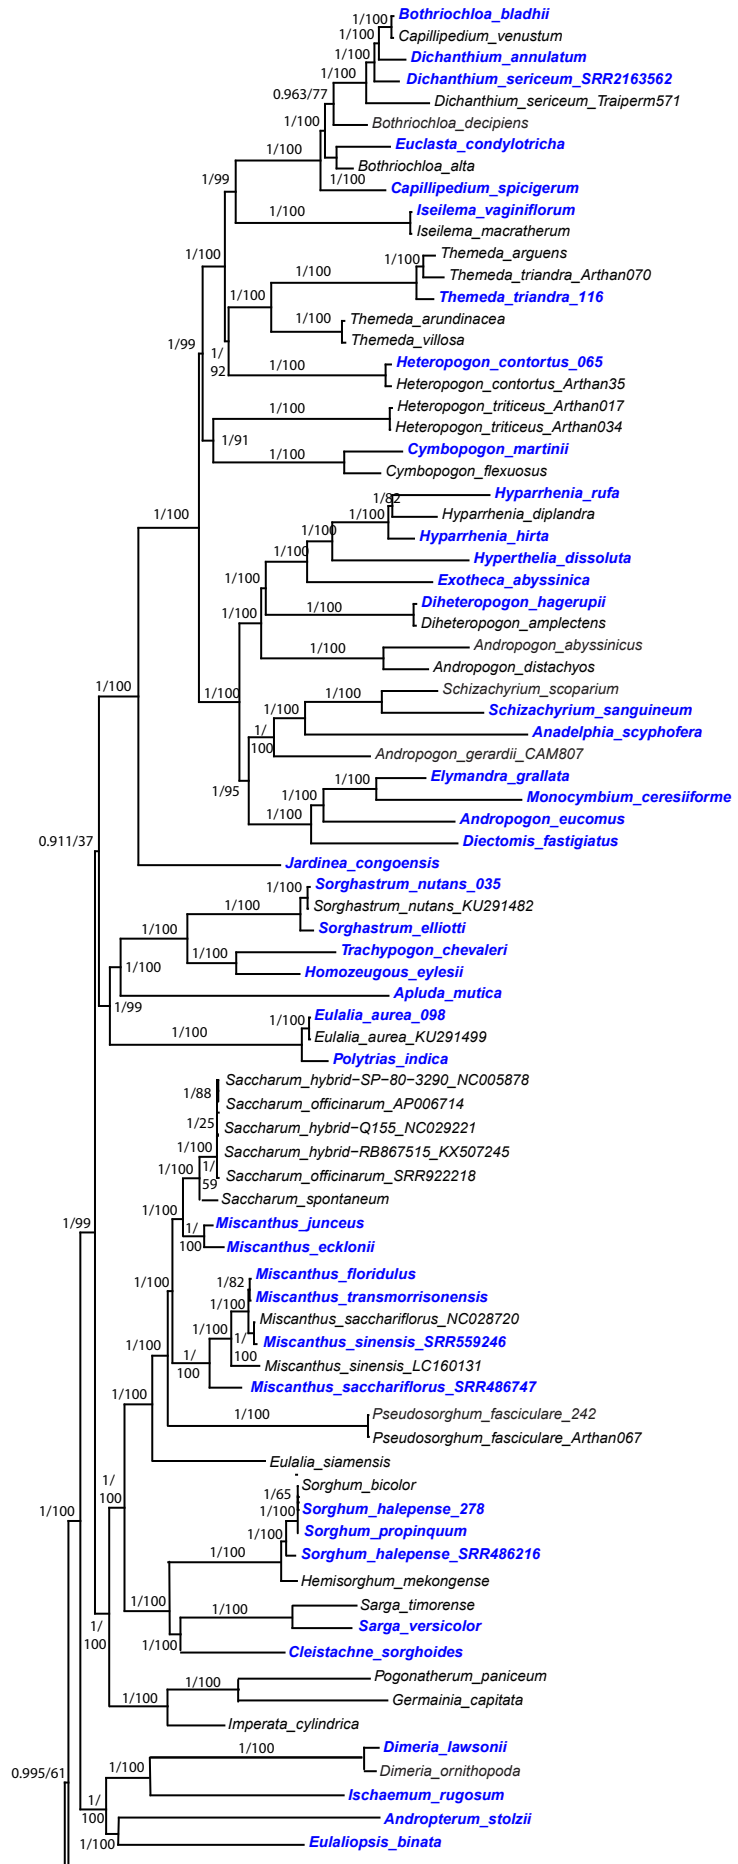

Table S1. Voucher and Genbank numbers for taxa newly added to the 4-gene tree (Figs. 1 and S1). All others from Estep et al. (2014).

| Species (specimen #)                  | Voucher                            | Herbarium    | REP1 | EP8 | EP7 | D8 | APO1 |
|---------------------------------------|------------------------------------|--------------|------|-----|-----|----|------|
| <i>Chionachne koenigii</i> (057)      | Kellogg Chio-6-D-93                | MO           |      |     |     |    |      |
| <i>Chionachne koenigii</i> (122)      | Kellogg Chio-8-D-93                | MO           |      |     |     |    |      |
| <i>Elionurus citreus</i> (140)        | Jacobs 9561                        | TCD          |      |     |     |    |      |
| <i>Elionurus muticus</i> (015)        | Malcomber 3077                     | MO           |      |     |     |    |      |
| <i>Hemarthria altissima</i> (036)     | Malcomber 3061                     | MO           |      |     |     |    |      |
| <i>Hemarthria compressa</i> (111)     | Kellogg PI 404118                  | MO           |      |     |     |    |      |
| <i>Hemarthria longiflora</i> (149)    | Teerawatananon & Sungkaew 100704-3 | THNHM        |      |     |     |    |      |
| <i>Hemarthria pratensis</i> (150)     | Teerawatananon & Sungkaew 892      | THNHM        |      |     |     |    |      |
| <i>Hemarthria uncinata</i> (071)      | Kellogg PI 401713                  | MO (sterile) |      |     |     |    |      |
| <i>Heteropholis sulcata</i> (017)     | Malcomber 3103                     | MO           |      |     |     |    |      |
| <i>Mnesithea formosa</i> (158)        | Jacobs 9526                        | TCD          |      |     |     |    |      |
| <i>Oxyrhachis gracillima</i> (044)    | Malcomber 3092                     | MO           |      |     |     |    |      |
| <i>Phacelurus huillensis</i> (026)    | Malcomber 3087                     | MO           |      |     |     |    |      |
| <i>Polytoca digitata</i> (161)        | Teerawatananon & Sungkaew 844      | THNHM        |      |     |     |    |      |
| <i>Polytoca wallichiana</i> (162)     | Teerawatananon & Sungkaew 683      | THNHM        |      |     |     |    |      |
| <i>Rhytachne rottboelloides</i> (027) | Malcomber 3105                     | MO           |      |     |     |    |      |
| <i>Rhytachne rottboelloides</i> (029) | Malcomber 3106                     | MO           |      |     |     |    |      |
| <i>Rottboellia aurita</i> (030)       | Kellogg PI 404628                  | A            |      |     |     |    |      |
| <i>Rottboellia cylindrica</i> (191)   | Kellogg 1258                       | MO           |      |     |     |    |      |
| <i>Rottboellia lepidura</i> (059)     | Malcomber 3060                     | MO           |      |     |     |    |      |
| <i>Rottboellia selleana</i> (031)     | Kellogg PI 404763                  | A            |      |     |     |    |      |

|                                                           |                                         |                              |  |  |  |  |  |
|-----------------------------------------------------------|-----------------------------------------|------------------------------|--|--|--|--|--|
| <i>Rottboellia selloana</i><br>(074)                      | <i>Kellogg PI</i><br>404304             | MO                           |  |  |  |  |  |
| <i>Sorghum versicolor</i><br>(040)                        | <i>Kellogg PI</i><br>260273             | MO                           |  |  |  |  |  |
| <i>Tripsacum australe</i> var.<br><i>hirsutum</i> (174)   | <i>Kellogg MIA</i><br>34499             | MO                           |  |  |  |  |  |
| <i>Tripsacum</i><br><i>cundinamarcae</i> (175)            | <i>Kellogg MIA</i><br>34640             | MO                           |  |  |  |  |  |
| <i>Tripsacum dactyloides</i><br>(178)                     | <i>Kellogg MIA</i><br>34723             | MO<br>(living<br>collection) |  |  |  |  |  |
| <i>Tripsacum floridanum</i><br>(109)                      | <i>Kellogg MIA</i><br>34719             | MO                           |  |  |  |  |  |
| <i>Tripsacum laxum</i> (179)                              | <i>Kellogg MIA</i><br>34792             | MO                           |  |  |  |  |  |
| <i>Tripsacum peruvianum</i><br>(117)                      | <i>Kellogg MIA</i><br>34501             | N/A                          |  |  |  |  |  |
| <i>Tripsacum pilosum</i> var<br><i>guatemalense</i> (173) | <i>Kellogg MIA</i><br>34721             | N/A                          |  |  |  |  |  |
| <i>Urelytrum digitatum</i><br>(042)                       | <i>Malcomber</i><br>3109                | MO                           |  |  |  |  |  |
| <i>Vossia cuspidata</i> (180)                             | <i>Pasquet 1098</i>                     | MO                           |  |  |  |  |  |
| <i>Zea diploperennis</i> (043)                            | <i>Ortiz &amp; Gomez</i><br>K-1996-1827 | A                            |  |  |  |  |  |
| <i>Zea luxurians</i> (096)                                | <i>Kellogg G-42</i>                     | MO                           |  |  |  |  |  |
| <i>Zea perennis</i> (114)                                 | <i>Kellogg AMES</i><br>21872            | MO                           |  |  |  |  |  |

Table S2. Voucher information and assembly statistics for transcriptome data.

| Species (specimen #)                         | Collector              | Herbarium     | GenBank # |
|----------------------------------------------|------------------------|---------------|-----------|
| <i>Chionachne koenigii</i> (057)             | Kellogg Chio-6-D-93    | MO            |           |
| <i>Arthraxon micans</i> (231)                | Pasquet 1242           | MO            |           |
| <i>Tripsacum dactyloides</i> (041)           | Kellogg 1160           | MO            |           |
| <i>Tripsacum australe</i> (174)              | Kellogg MIA 34499      | MO            |           |
| <i>Tripsacum cundinamarcae</i> (175)         | Kellogg MIA 34640      | MO            |           |
| <i>Tripsacum laxum</i> (179)                 | Kellogg MIA 34792      | MO            |           |
| <i>Tripsacum peruvianum</i> (117)            | Kellogg MIA 34501      | N/A           |           |
| <i>Zea perennis</i> (114)                    | Kellogg AMES 21872     | MO            |           |
| <i>Vossia cuspidata</i> (180)                | Pasquet 1098           | MO            |           |
| <i>Urelytrum digitatum</i> (042)             | Malcomber 3109         | MO            |           |
| <i>Chrysopogon nigritanus</i> (272)          | Pasquet 1200           | MO            |           |
| <i>Schizachyrium brevifolium</i> (291)       | Kellogg Kew MSB 443797 | MO            |           |
| <i>Hemarthria compressa</i> (111)            | Kellogg PI 404118      | MO            |           |
| <i>Rottboellia</i> sp.                       |                        |               |           |
| <i>Themeda triandra</i>                      | Kellogg PI 206349      | MO            |           |
| <i>Saccharum officinarum</i>                 | Welker s.n.            | MBG-1999-0450 |           |
| <i>Arundinella hirta</i>                     | PI 263793              | MO            |           |
| <i>Arundinella hookeri</i>                   | Kew 0050290            | NA            |           |
| <i>Miscanthus sacchariflorus</i> (SRR871074) |                        |               |           |
| <i>Miscanthus sinensis</i> (SRR916839)       |                        |               |           |

| Species (specimen #)                   | Contigs | Genes  | Isoforms per Contig | Average Length | Assembled Bases |
|----------------------------------------|---------|--------|---------------------|----------------|-----------------|
| <i>Chionachne koenigii</i> (057)       | 93739   | 71025  | 1.3198              | 974.71         | 91367893        |
| <i>Arthraxon micans</i> (231)          | 143720  | 103595 | 1.3873              | 961.52         | 138190303       |
| <i>Tripsacum dactyloides</i> (041)     | 137609  | 93445  | 1.4726              | 852.95         | 117374159       |
| <i>Tripsacum australe</i> (174)        | 160514  | 117343 | 1.3679              | 860.99         | 138200786       |
| <i>Tripsacum cundinamarcae</i> (175)   | 143318  | 102374 | 1.3999              | 847.38         | 121445172       |
| <i>Tripsacum laxum</i> (179)           | 123675  | 89435  | 1.3828              | 862.02         | 106610721       |
| <i>Tripsacum peruvianum</i> (117)      | 188848  | 132058 | 1.4300              | 779.72         | 147249268       |
| <i>Zea perennis</i> (114)              | 113144  | 81949  | 1.3807              | 962.25         | 108872367       |
| <i>Vossia cuspidata</i> (180)          | 115196  | 86697  | 1.3287              | 941.59         | 108467466       |
| <i>Urelytrum digitatum</i> (042)       | 198517  | 136465 | 1.4547              | 671.84         | 133371534       |
| <i>Chrysopogon nigritanus</i> (272)    | 90858   | 90848  | 1.0001              | 667.1          | 60611225        |
| <i>Schizachyrium brevifolium</i> (291) | 102101  | 102089 | 1.0001              | 636.42         | 64978634        |
| <i>Hemarthria compressa</i> (111)      | 74072   | 58992  | 1.2556              | 952.84         | 70578851        |
| <i>Rottboellia</i> sp.                 | 157784  | 131011 | 1.2044              | 752.98         | 118807483       |
| <i>Themeda triandra</i>                | 110981  | 78989  | 1.4050              | 807.51         | 89618351        |
| <i>Saccharum officinarum</i>           | 118238  | 83981  | 1.4079              | 814.99         | 96362962        |

|                                                 |        |       |        |        |          |
|-------------------------------------------------|--------|-------|--------|--------|----------|
| <i>Arundinella hirta</i>                        | 125753 | 87984 | 1.4293 | 730.18 | 91822865 |
| <i>Arundinella hookeri</i>                      | 67209  | 58113 | 1.1565 | 773.66 | 51997081 |
| <i>Miscanthus sacchariflorus</i><br>(SRR871074) | 63502  | 58445 | 1.0865 | 671.59 | 42647193 |
| <i>Miscanthus sinensis</i><br>(SRR916839)       | 58185  | 47212 | 1.232  | 597.73 | 34778631 |



Table S3. Voucher and GenBank accession numbers of plastome data. Accession numbers beginning with SRR refer to short read data downloaded from GenBank.

| <b>Species (specimen #)</b>             | <b>Voucher/<br/>Cultivar</b>   | <b>Herbarium/<br/>Source</b> | <b>Reference</b>               | <b>GenBank<br/>number</b> |
|-----------------------------------------|--------------------------------|------------------------------|--------------------------------|---------------------------|
| <i>Anadelphia scyphofera</i> (256)      | <i>Pasquet 1237</i>            | MO                           | This study                     |                           |
| <i>Andropogon abyssinicus</i>           | <i>Pasquet 1097</i>            | MO                           | Arthan et al. 2017             | KY596148                  |
| <i>Andropogon burmanicus</i>            | <i>Arthan071</i>               | BKF                          | Arthan et al. 2017             | KY596164                  |
| <i>Andropogon burmanicus</i>            | <i>Traiperm 572</i>            | BKF,MO                       | Arthan et al. 2017             | KY596167                  |
| <i>Andropogon distachyos</i>            | <i>Arthan050</i>               | BKF                          | Arthan et al. 2017             | KY596133                  |
| <i>Andropogon eucomus</i> (001)         | <i>Malcomber 3089</i>          | MO                           | This study                     |                           |
| <i>Andropogon gerardii</i>              | <i>McAllister 807</i>          | MO                           | McAllister et al. 2018         | MH181165                  |
| <i>Andropterum stolzii</i> (050)        | <i>Malcomber 3091</i>          | MO                           | This study                     |                           |
| <i>Apluda mutica</i> (100)              | <i>Kellogg PI 219568</i>       | MO                           | This study                     |                           |
| <i>Arthraxon hispidus</i>               | <i>Arthan023</i>               | BKF                          | Arthan et al. 2017             | KY596179                  |
| <i>Arthraxon lanceolatus</i>            | <i>Arthan001</i>               | BKF                          | Arthan et al. 2017             | KY596127                  |
| <i>Arthraxon lanceolatus</i>            | <i>Arthan059</i>               | BKF                          | Arthan et al. 2017             | KY596185                  |
| <i>Arthraxon microphyllus</i>           | <i>Traiperm 537</i>            | BKF                          | Arthan et al. 2017             | KY596183                  |
| <i>Arthraxon prionodes</i>              | <i>Kellogg PI 659331</i>       | MO                           | Arthan et al. 2017             | KY596138                  |
| <i>Arundinella deppeana</i>             | <i>Clark et al. 1680</i>       | XAL                          | Burke et al. 2016              | KU291490                  |
| <i>Arundinella hirta</i> (SRR2163563)   | <i>PI 246756</i>               | MO                           | Washburn et al.;<br>This study |                           |
| <i>Arundinella hookeri</i> (SRR2163560) | <i>Kew 0050290</i>             | N/A                          | Washburn et al.;<br>This study |                           |
| <i>Arundinella nepalensis</i> (115)     | <i>Kellogg PI 384059</i>       | MO                           | This study                     |                           |
| <i>Bothriochloa alta</i>                | <i>Duvall s.n.</i>             | DEK                          | Burke et al. 2016              | KU291492                  |
| <i>Bothriochloa decipiens</i> (086)     | <i>Kellogg PI 239153</i>       | MO                           | McAllister et al. 2018         |                           |
| <i>Bothriochloa bladhii</i> (087)       | <i>Kellogg PI 301632</i>       | MO                           | This study                     |                           |
| <i>Capillipedium spicigerum</i> (090)   | <i>Kellogg PI 301773</i>       | MO                           | This study                     |                           |
| <i>Capillipedium venustum</i>           | "PI 11713"<br>(invalid number) | N/A                          | Burke et al. 2016              | KU291493                  |
| <i>Chasmopodium caudatum</i> (120)      | <i>Kellogg Kew MSB 0184054</i> | MO                           | This study                     |                           |

|                                          |                                |      |                             |          |
|------------------------------------------|--------------------------------|------|-----------------------------|----------|
| <i>Chionachne koenigii</i> (057)         | Kellogg Chio-6-D-93            | MO   | This study                  |          |
| <i>Chrysopogon aciculatus</i> (326)      | Sumadijaya 714                 | MO   | This study                  |          |
| <i>Chrysopogon gryllus</i>               | Kellogg PI 250984              | A    | Arthan et al. 2017          | KY596161 |
| <i>Chrysopogon orientalis</i>            | Traiperm 578                   | BKF  | Arthan et al. 2017          | KY596177 |
| <i>Chrysopogon serrulatus</i>            | Kellogg PI 219580              | A,MO | Welker et al. 2016          | NC029884 |
| <i>Chrysopogon zizanioides</i>           | Kellogg Vet-MRL-001 (Sunshine) | MO   | Arthan et al. 2017          | KY596158 |
| <i>Cleistachne sorghoides</i> (293)      | M. Bigazzi & M. Tardelli 719   | FT   | This study                  |          |
| <i>Rottboellia lepidura</i> (059)        | Malcomber 3060                 | MO   | This study                  |          |
| <i>Coix aquatica</i> (SRR1634981)        | N/A                            | N/A  | This study                  |          |
| <i>Coix lacryma-jobi</i>                 | Arthan072                      | BKF  | Arthan et al. 2017          | KY596160 |
| <i>Coleataenia prionitis</i>             | Morrone 6195                   | SI   | Cotton et al. (Unpublished) | KJ920228 |
| <i>Cymbopogon flexuosus</i>              | Arthan027                      | BKF  | Arthan et al. 2017          | KY596169 |
| <i>Cymbopogon martinii</i> (048)         | Kellogg PI 219582              | MO   | This study                  |          |
| <i>Dichanthium annulatum</i> (013)       | Kellogg PI 240155              | A/GH | This study                  |          |
| <i>Dichanthium sericeum</i> (SRR2163562) | PI 213880                      | MO   | Washburn et al.; This study |          |
| <i>Dichanthium sericeum</i>              | Traiperm 571                   | BKF  | Arthan et al. 2017          | KY596128 |
| <i>Diectomis fastigiatus</i> (239)       | Pasquet 1191                   | MO   | This study                  |          |
| <i>Diheteropogon amplexans</i>           | "PI 12585" (invalid number)    | N/A  | Burke et al. 2016           | KU291497 |
| <i>Diheteropogon hagerupii</i> (183)     | Kellogg Kew MSB 0254456        | MO   | This study                  |          |
| <i>Dimeria lawsonii</i> (508)            | Kiran Raj 81018                | MO   | This study                  |          |
| <i>Dimeria ornithopoda</i>               | Traiperm 575                   | BKF  | Arthan et al. 2017          | KY596130 |
| <i>Elionurus muticus</i> (015)           | Malcomber 3077                 | MO   | This study                  |          |
| <i>Elionurus tripsacoides</i> (198)      | Layton & Zhong 168             | MO   | This study                  |          |
| <i>Elymandra grallata</i> (254)          | Pasquet 1184                   | MO   | This study                  |          |
| <i>Eremochloa ciliaris</i>               | Traiperm 524                   | BKF  | Arthan et al. 2017          | KY596146 |

|                                         |                                   |                 |                    |          |
|-----------------------------------------|-----------------------------------|-----------------|--------------------|----------|
| <i>Eremochloa eriopoda</i>              | Traiperm 591                      | BKF             | Arthan et al. 2017 | KY596134 |
| <i>Eriochrysis cayennensis</i>          | Welker 519                        | ICN             | Welker et al. 2016 | KU961861 |
| <i>Eriochrysis cayennensis</i>          | Welker 365                        | ICN             | Welker et al. 2016 | KU961862 |
| <i>Eriochrysis laxa</i>                 | Welker 489                        | ICN             | Welker et al. 2016 | KU961863 |
| <i>Eriochrysis pallida</i> (568)        | Pasquet 1162                      | MO              | Welker et al. 2018 |          |
| <i>Eriochrysis villosa</i>              | Welker 481B                       | ICN             | Welker et al. 2016 | KU961860 |
| <i>Euclasta condylotricha</i> (232)     | Pasquet 1245                      | MO              | This study         |          |
| <i>Eulalia aurea</i>                    | "PI 12153"<br>(invalid<br>number) | N/A             | Burke et al. 2016  | KU291499 |
| <i>Eulalia aurea</i> (098)              | Kellogg PI<br>249139              | MO              | This study         |          |
| <i>Eulalia contorta</i>                 | Traiperm 573                      | BKF             | Arthan et al. 2017 | KY596143 |
| <i>Eulalia siamensis</i>                | Traiperm 557                      | BKF             | Arthan et al. 2017 | KY596149 |
| <i>Eulaliopsis binata</i>               | Traiperm 567                      | BKF             | Arthan et al. 2017 | KY596182 |
| <i>Exothea abyssinica</i> (211)         | Pasquet 1102                      | MO              | This study         |          |
| <i>Garnotia tenella</i>                 | Traiperm 552                      | BKF             | Arthan et al. 2017 | KY596184 |
| <i>Garnotia thailandica</i>             | Traiperm 535                      | BKF             | Arthan et al. 2017 | KY596171 |
| <i>Germainia capitata</i>               | Arthan028                         | BKF             | Arthan et al. 2017 | KY596175 |
| <i>Hackelochloa granularis</i><br>(205) | Pasquet 1113                      | MO              | This study         |          |
| <i>Hemarthria altissima</i> (036)       | Malcomber<br>3061                 | MO              | This study         |          |
| <i>Hemarthria compressa</i> (111)       | Kellogg PI<br>404118              | MO              | This study         |          |
| <i>Hemarthria uncinata</i> (071)        | Kellogg PI<br>401713              | MO<br>(sterile) | This study         |          |
| <i>Hemisorghum mekongense</i>           | Traiperm 569                      | BKF             | Arthan et al. 2017 | KY596132 |
| <i>Heteropogon contortus</i>            | Arthan035                         | BKF             | Arthan et al. 2017 | KY596145 |
| <i>Heteropogon contortus</i> (065)      | Kellogg PI<br>271177              | MO              | This study         |          |
| <i>Heteropogon triticeus</i>            | Arthan017                         | BKF             | Arthan et al. 2017 | KY596153 |
| <i>Heteropogon triticeus</i>            | Arthan034                         | BKF             | Arthan et al. 2017 | KY596142 |
| <i>Homozeugos eylesii</i> (258)         | Pasquet 1161                      | MO              | This study         |          |
| <i>Hyparrhenia diplandra</i>            | Arthan012                         | BKF             | Arthan et al. 2017 | KY596163 |
| <i>Hyparrhenia hirta</i> (095)          | Kellogg PI<br>300696              | MO              | This study         |          |
| <i>Hyparrhenia rufa</i> (108)           | Kellogg PI<br>356815              | MO              | This study         |          |
| <i>Hyperthelia dissoluta</i> (204)      | Kellogg 1137                      | MO              | This study         |          |
| <i>Imperata cylindrica</i>              | Burke 21                          | DEK             | Burke et al. 2016  | KU291466 |
| <i>Ischaemum afrum</i>                  | PI 364924                         | A               | Burke et al. 2016  | KU291467 |
| <i>Ischaemum rugosum</i> (186)          | Kellogg Kew<br>MSB 0183574        | MO              | This study         |          |
| <i>Iseilema macratherum</i>             | PI 257760                         | N/A             | Burke et al. 2016  | KU291468 |

|                                                         |                                                |                |                                           |          |
|---------------------------------------------------------|------------------------------------------------|----------------|-------------------------------------------|----------|
| <i>Iseilema vaginiflorum</i> (213)                      | <i>E.J. Thompson<br/>MUT518-<br/>TBKS</i>      |                | This study                                |          |
| <i>Jardinea congoensis</i> (298)                        | <i>R. Jermain<br/>4306</i>                     | Milan          | This study                                |          |
| <i>Kerriochloa siamensis</i>                            | <i>Traiperm 581</i>                            | BKF            | Arthan et al. 2017                        | KY596117 |
| <i>Kerriochloa siamensis</i>                            | <i>Traiperm 580</i>                            | BKF            | Arthan et al. 2017                        | KY596120 |
| <i>Loxodera bovonei</i> (520)                           | <i>Pasquet 1229</i>                            | MO             | This study                                |          |
| <i>Loxodera bovonei</i> (536)                           | <i>Pasquet 1256</i>                            | MO             | This study                                |          |
| <i>Loxodera caespitosa</i> (304)                        | <i>Pasquet 1268</i>                            | MO             | This study                                |          |
| <i>Microstegium vimineum</i><br>(124)                   | <i>Kellogg VA2</i>                             | MO             | This study                                |          |
| <i>Miscanthus ecklonii</i> (089)                        | <i>Kellogg<br/>410159</i>                      | MO             | This study                                |          |
| <i>Miscanthus floridulus</i><br>(SRR486154)             | US56-0022-03                                   | N/A            | Welker et al.<br>2018; JGI<br>unpublished |          |
| <i>Miscanthus junceus</i> (255)                         | <i>Pasquet 1213</i>                            | MO             | This study                                |          |
| <i>Miscanthus sacchariflorus</i>                        | N/A                                            | GenBank        | Nah et al.<br>unpublished                 | NC028720 |
| <i>Miscanthus sacchariflorus</i><br>(SRR486747)         | EF03(01-03)<br>var Hercules                    | N/A            | This study; JGI<br>unpublished            |          |
| <i>Miscanthus sinensis</i>                              | Niigata410                                     | N/A            | Tsuruta et al.<br>unpublished             | LC160131 |
| <i>Miscanthus sinensis</i><br>(SRR559246)               | IGR-2011-003                                   | N/A            | This study; JGI<br>unpublished            |          |
| <i>Miscanthus<br/>transmorrisonensis</i><br>(SRR396850) | N/A                                            | N/A            | This study; JGI<br>unpublished            |          |
| <i>Mnesithea formosa</i> (212)                          | <i>E. J.<br/>Thompson<br/>CHA812-<br/>TBKS</i> | BRI            | This study                                |          |
| <i>Mnesithea helferi</i>                                | <i>Traiperm 574</i>                            | BKF            | Arthan et al. 2017                        | KY596162 |
| <i>Monocymbium ceresiiforme</i><br>(203)                | <i>Kellogg 1115</i>                            | MO             | This study                                |          |
| <i>Oxyrhachis gracillima</i> (303)                      | <i>Pasquet 1271</i>                            | MO             | This study                                |          |
| <i>Parahyparrhenia siamensis</i>                        | <i>Traiperm 583</i>                            | BKF            | Arthan et al. 2017                        | KY596155 |
| <i>Paspalum malacophyllum</i><br>(058)                  | <i>Kellogg PI<br/>271572</i>                   | MO             | This study                                |          |
| <i>Paspalum vaginatum</i><br>(SRR2163016)               | <i>PI 509022</i>                               | MO-<br>6635035 | Washburn et al.;<br>This study            |          |
| <i>Phacelurus huillensis</i> (024)                      | <i>Malcomber<br/>3100</i>                      | MO             | This study                                |          |
| <i>Pogonatherum paniceum</i>                            | <i>Clark s.n.</i>                              | MO             | Welker et al. 2016                        | NC029881 |

|                                          |                         |                 |                             |          |
|------------------------------------------|-------------------------|-----------------|-----------------------------|----------|
| <i>Polytoca digitata</i>                 | Arthan054               | BKF             | Arthan et al. 2017          | KY596178 |
| <i>Polytoca digitata</i>                 | Arthan060               | BKF             | Arthan et al. 2017          | KY596173 |
| <i>Polytrias indica</i> (073)            | Kellogg 1264            | MO              | This study                  |          |
| <i>Pseudosorghum fasciculare</i>         | Arthan067               | BKF             | Arthan et al. 2017          | KY596157 |
| <i>Pseudosorghum fasciculare</i>         | Traiperm 512            | BKF             | Arthan et al. 2017          | KY596139 |
| <i>Rhytachne rottboellioides</i> (027)   | Malcomber 3105          | MO              | This study                  |          |
| <i>Rottboellia cochinchinensis</i>       | Clark et al. 1698       | ISC             | Burke et al. 2016           | KU291481 |
| <i>Rottboellia cochinchinensis</i> (193) | Layton & Zhong 158      | MO              | This study                  |          |
| <i>Rottboellia selloana</i> (074)        | Kellogg PI 404304       | MO              | This study                  |          |
| <i>Saccharum</i> hybrid                  | Cultivar SP80-3280      | GenBank         | Calsa et al. 2004           | NC005878 |
| <i>Saccharum</i> hybrid                  | RB867515                | GenBank         | Vidigal et al. unpublished  | KX507245 |
| <i>Saccharum</i> hybrid                  | Q155                    | GenBank         | Massouh et al. unpublished  | NC029221 |
| <i>Saccharum</i> hybrid                  | SP-80-3290              | GenBank         | Calsa et al. 2004           | NC005878 |
| <i>Saccharum officinarum</i>             | Cultivar NCo 310        | GenBank         | Asano et al. 2004           | AP006714 |
| <i>Saccharum officinarum</i> (SRR922218) | cultivar B4362          | MO              | Welker et al. 2018          |          |
| <i>Saccharum spontaneum</i> (SRR486146)  | SES234B library         | N/A             | Welker et al. 2018          |          |
| <i>Sarga timorensis</i>                  | N/A                     | GenBank         | Keepers et al. unpublished  | NC023800 |
| <i>Sarga versicolor</i> (SRR427175)      | N/A                     | JGI; 2012-03-04 | This study; JGI unpublished | 4093395  |
| <i>Schizachyrium sanguineum</i>          | Welker 515              | ICN             | This study                  |          |
| <i>Schizachyrium scoparium</i>           | Kellogg V46             | MO              | This study                  | KY596154 |
| <i>Sehima nervosum</i> (034)             | Malcomber 3074          | MO              | This study                  |          |
| <i>Setaria italica</i>                   | Yugul                   | GenBank         | Diaz et al. unpublished     | KJ001642 |
| <i>Sorghastrum elliotti</i> (187)        | Kellogg Kew MSB 0491101 | MO              | This study                  |          |
| <i>Sorghastrum nutans</i>                | Wysocki s.n.            | DEK             | Burke et al. 2016           | KU291482 |
| <i>Sorghastrum nutans</i> (035)          | Kellogg PI 315744       | A               | This study                  |          |
| <i>Sorghum bicolor</i>                   | BTx623                  | GenBank         | Saski et al. 2009           | NC008602 |
| <i>Sorghum halepense</i> (SRR486216)     | Gypsum9                 | N/A             | This study; JGI unpublished |          |

|                                           |                      |                        |                                 |          |
|-------------------------------------------|----------------------|------------------------|---------------------------------|----------|
| <i>Sorghum halepense</i> (278)            | McKain 121           | MO                     | This study                      |          |
| <i>Sorghum propinquum</i> (SRR998982)     | 369-1                | N/A                    | Mace et al. 2013:<br>This study |          |
| <i>Steinchisma decipiens</i> (SRR2163017) | PI 462236            | MO-6635036             | Washburn et al.;<br>This study  |          |
| <i>Thelepogon elegans</i> (257)           | Pasquet 1246         | MO                     | This study                      |          |
| <i>Themeda arguens</i>                    | Arthan020            | BKF                    | Arthan et al. 2017              | KY596129 |
| <i>Themeda arundinacea</i>                | Arthan064            | BKF                    | Arthan et al. 2017              | KY596123 |
| <i>Themeda triandra</i>                   | Arthan070            | BKF                    | Arthan et al. 2017              | KY596125 |
| <i>Themeda triandra</i> (116)             | Kellogg PI 207932    | USD-GRIN image         | This study                      |          |
| <i>Themeda villosa</i>                    | Arthan065            | BKF                    | Arthan et al. 2017              | KY596131 |
| <i>Trachypogon chevalieri</i> (281)       | Pasquet 1190         | MO                     | This study                      |          |
| <i>Tripidium arundinacea</i>              | Isolate JW360        | GenBank                | Tsuruta et al. unpublished      | NC030777 |
| <i>Tripidium ravennae</i> (110)           | Vela s.n.            | MO                     | Welker et al. 2018              |          |
| <i>Tripsacum andersonii</i> (118)         | Kellogg MIA 34430    | N/A                    | This study                      |          |
| <i>Tripsacum australe</i> (174)           | Kellogg MIA 34499    | MO                     | This study                      |          |
| <i>Tripsacum cundinamarcae</i> (175)      | Kellogg MIA 34640    | MO (living collection) | This study                      |          |
| <i>Tripsacum dactyloides</i> (SRR447807)  | inbred line TDD39103 | N/A                    | This study                      |          |
| <i>Tripsacum dactyloides</i> (041)        | Kellogg 1160         | MO                     | This study                      |          |
| <i>Tripsacum dactyloides</i> (178)        | Kellogg MIA 34723    | MO (living collection) | This study                      |          |
| <i>Tripsacum floridanum</i> (109)         | Kellogg MIA 34719    | MO                     | This study                      |          |
| <i>Tripsacum laxum</i> (179)              | Kellogg MIA 34792    | MO                     | This study                      |          |
| <i>Tripsacum peruvianum</i> (117)         | Kellogg MIA 34501    | N/A                    | This study                      |          |
| <i>Tripsacum pilosum</i> (173)            | Kellogg MIA 34721    | N/A                    | This study                      |          |
| <i>Urelytrum agropyroides</i> (221)       | Pasquet 1233         | MO                     | This study                      |          |
| <i>Urelytrum digitatum</i> (042)          | Malcomber 3109       | MO                     | This study                      |          |
| <i>Vossia cuspidata</i> (180)             | Pasquet 1098         | MO                     | This study                      |          |
| <i>Vossia cuspidata</i> (282)             | Pasquet 1222         | MO                     | This study                      |          |

|                                   |                                      |                           |                                   |          |
|-----------------------------------|--------------------------------------|---------------------------|-----------------------------------|----------|
| <i>Zea diploperennis</i> (043)    | <i>Ortiz &amp; Gomez K-1996-1827</i> | A                         | This study                        |          |
| <i>Zea luxurians</i>              | N/A                                  | GenBank                   | Orton et al. 2016                 | KR873424 |
| <i>Zea luxurians</i> (096)        | <i>Kellogg G-42</i>                  | MO                        | This study                        |          |
| <i>Zea mays</i>                   | A188                                 | GenBank                   | Bosacchi, Gurdon, and Maliga 2015 | KF241980 |
| <i>Zea mays</i>                   | B73                                  | GenBank                   | Bosacchi, Gurdon, and Maliga 2015 | KF241981 |
| <i>Zea mays</i>                   | N/A                                  | GenBank                   | Maier et al. 1995.                | NC001666 |
| <i>Zea mays-B37C</i>              | B37C                                 | GenBank                   | Bosacchi, Gurdon, and Maliga 2015 | KP966115 |
| <i>Zea mays-B37N</i>              | B37N                                 | GenBank                   | Bosacchi, Gurdon, and Maliga 2015 | KP966114 |
| <i>Zea mays-B37S</i>              | B37S                                 | GenBank                   | Bosacchi, Gurdon, and Maliga 2015 | KP966116 |
| <i>Zea mays-B37T</i>              | B37T                                 | GenBank                   | Bosacchi, Gurdon, and Maliga 2015 | KP966117 |
| <i>Zea mays-huehuetenangensis</i> | <i>PI 441934</i>                     | GenBank                   | Orton et al. 2016                 | KR873422 |
| <i>Zea nicaraguensis</i> (279)    |                                      | MO<br>(living collection) | This study                        |          |
| <i>Zea perennis</i>               | <i>AMES 21874</i>                    | GenBank                   | Orton et al. 2016                 | KR873423 |
| <i>Zea perennis</i> (114)         | <i>Kellogg AMES 21872</i>            | MO                        | This study                        |          |

Table S4. Numbers of clades with the given taxon sister to a *Zea-Tripsacum* paralog. BSV = ML bootstrap support value for the relevant clade.

| <b>Taxon</b>                   | <b>BSV5</b> | <b>BSV10</b> | <b>BSV15</b> | <b>BSV20</b> | <b>BSV25</b> | <b>BSV30</b> | <b>BSV35</b> |
|--------------------------------|-------------|--------------|--------------|--------------|--------------|--------------|--------------|
| <i>Arthraxon</i>               | 42          | 39           | 35           | 33           | 29           | 27           | 24           |
| <i>Chionachne</i>              | 50          | 48           | 44           | 42           | 37           | 35           | 28           |
| <i>Chrysopogon</i>             | 23          | 22           | 22           | 21           | 17           | 16           | 12           |
| <i>Rottboellia, Hemarthria</i> | 123         | 120          | 113          | 103          | 85           | 71           | 65           |
| <i>Thelepogon</i>              | 33          | 32           | 29           | 25           | 22           | 17           | 16           |
| <i>Tripsacum, Zea, Zmays</i>   | 1880        | 1850         | 1804         | 1755         | 1698         | 1621         | 1536         |
| <i>Urelytrum, Vossia</i>       | 595         | 589          | 578          | 566          | 542          | 504          | 461          |

| <b>Taxon</b>                   | <b>BSV40</b> | <b>BSV45</b> | <b>BSV50</b> | <b>BSV55</b> | <b>BSV60</b> | <b>BSV65</b> | <b>BSV70</b> |
|--------------------------------|--------------|--------------|--------------|--------------|--------------|--------------|--------------|
| <i>Arthraxon</i>               | 17           | 11           | 9            | 6            | 6            | 6            | 3            |
| <i>Chionachne</i>              | 23           | 19           | 16           | 15           | 14           | 11           | 7            |
| <i>Chrysopogon</i>             | 11           | 8            | 7            | 6            | 6            | 6            | 4            |
| <i>Rottboellia, Hemarthria</i> | 60           | 46           | 39           | 29           | 21           | 17           | 13           |
| <i>Thelepogon</i>              | 12           | 10           | 7            | 5            | 4            | 3            | 3            |
| <i>Tripsacum, Zea, Zmays</i>   | 1441         | 1353         | 1281         | 1171         | 1069         | 937          | 835          |
| <i>Urelytrum, Vossia</i>       | 423          | 375          | 330          | 279          | 233          | 198          | 165          |

| <b>Taxon</b>                   | <b>BSV75</b> | <b>BSV80</b> | <b>BSV85</b> | <b>BSV90</b> | <b>BSV95</b> | <b>BSV100</b> |
|--------------------------------|--------------|--------------|--------------|--------------|--------------|---------------|
| <i>Arthraxon</i>               | 1            | 0            | 0            | 0            | 0            | 0             |
| <i>Chionachne</i>              | 6            | 5            | 5            | 4            | 3            | 1             |
| <i>Chrysopogon</i>             | 3            | 3            | 3            | 3            | 2            | 1             |
| <i>Rottboellia, Hemarthria</i> | 12           | 9            | 5            | 5            | 4            | 1             |
| <i>Thelepogon</i>              | 3            | 3            | 3            | 3            | 3            | 0             |
| <i>Tripsacum, Zea, Zmays</i>   | 750          | 656          | 543          | 447          | 330          | 131           |
| <i>Urelytrum, Vossia</i>       | 144          | 115          | 98           | 68           | 36           | 7             |



Table S5. Numbers of clades with the given taxon sister to the clade including both *Zea-Tripsacum* paralogs. BSV = ML bootstrap support value for the relevant clade.

| <b>Taxon</b>                   | <b>BSV5</b> | <b>BSV10</b> | <b>BSV15</b> | <b>BSV20</b> | <b>BSV25</b> | <b>BSV30</b> | <b>BSV35</b> |
|--------------------------------|-------------|--------------|--------------|--------------|--------------|--------------|--------------|
| <i>Arthraxon</i>               | 51          | 50           | 49           | 47           | 46           | 40           | 36           |
| <i>Chionachne</i>              | 41          | 41           | 38           | 37           | 37           | 33           | 30           |
| <i>Chrysopogon</i>             | 24          | 23           | 22           | 20           | 18           | 17           | 14           |
| <i>Rottboellia, Hemarthria</i> | 75          | 72           | 68           | 64           | 61           | 56           | 53           |
| <i>Thelepogon</i>              | 17          | 17           | 16           | 15           | 11           | 11           | 10           |
| <i>Tripsacum, Zea, Zmays</i>   | 58          | 57           | 53           | 49           | 43           | 39           | 37           |
| <i>Urelytrum, Vossia</i>       | 213         | 208          | 206          | 201          | 196          | 186          | 175          |

| <b>Taxon</b>                   | <b>BSV40</b> | <b>BSV45</b> | <b>BSV50</b> | <b>BSV55</b> | <b>BSV60</b> | <b>BSV65</b> | <b>BSV70</b> |
|--------------------------------|--------------|--------------|--------------|--------------|--------------|--------------|--------------|
| <i>Arthraxon</i>               | 34           | 30           | 28           | 25           | 24           | 21           | 18           |
| <i>Chionachne</i>              | 30           | 24           | 23           | 19           | 16           | 14           | 11           |
| <i>Chrysopogon</i>             | 14           | 14           | 13           | 10           | 9            | 8            | 7            |
| <i>Rottboellia, Hemarthria</i> | 46           | 40           | 38           | 34           | 29           | 26           | 23           |
| <i>Thelepogon</i>              | 8            | 7            | 7            | 7            | 6            | 5            | 5            |
| <i>Tripsacum, Zea, Zmays</i>   | 32           | 32           | 25           | 24           | 22           | 15           | 13           |
| <i>Urelytrum, Vossia</i>       | 165          | 158          | 153          | 136          | 126          | 118          | 104          |

| <b>Taxon</b>                   | <b>BSV75</b> | <b>BSV80</b> | <b>BSV85</b> | <b>BSV90</b> | <b>BSV95</b> | <b>BSV100</b> |
|--------------------------------|--------------|--------------|--------------|--------------|--------------|---------------|
| <i>Arthraxon</i>               | 16           | 16           | 14           | 11           | 6            | 2             |
| <i>Chionachne</i>              | 9            | 8            | 6            | 6            | 3            | 1             |
| <i>Chrysopogon</i>             | 5            | 4            | 4            | 4            | 3            | 2             |
| <i>Rottboellia, Hemarthria</i> | 22           | 18           | 12           | 7            | 6            | 3             |
| <i>Thelepogon</i>              | 4            | 4            | 2            | 2            | 2            | 0             |
| <i>Tripsacum, Zea, Zmays</i>   | 12           | 10           | 8            | 8            | 6            | 3             |
| <i>Urelytrum, Vossia</i>       | 93           | 84           | 70           | 55           | 45           | 16            |
